# Supplementary material for: Thyroid hormone receptor α controls larval intestinal epithelial cell death by regulating the CDK1 pathway
Source: PubMed Central journal article supplement (PMC8821549; doi:10.1038/s42003-022-03061-0), 2022-02-07
Supplement: 42003_2022_3061_MOESM3_ESM.pdf [file 42003_2022_3061_MOESM3_ESM.pdf]

## Description of Additional Supplementary Data Files

**File name:** Supplementary data

**Description:**

Supplementary Data 1. ChIP-Seq data of wild-type intestine without T3 treatment

Supplementary Data 2. ChIP-Seq data of wild-type intestine with T3 treatment

Supplementary Data 3. List of genes bound by TR in wild-type intestine

Supplementary Data 4. Counts and positions of ChIP-Seq Peaks present in all 3 replicates of the indicated sample

Supplementary Data 5. List of GO terms enriched in genes with TR-binding detected in wild-type intestine

Supplementary Data 6. List of pathways enriched in genes with TR-binding detected in wild-type intestine

Supplementary Data 7. ChIP-Seq data of TR $\alpha$ -/- intestine without T3 treatment

Supplementary Data 8. ChIP-Seq data of TR $\alpha$ -/- intestine with T3 treatment

Supplementary Data 9. List of genes bound by TR in TR $\alpha$ -/- intestine

Supplementary Data 10. Summary of genes with TR-binding regions

Supplementary Data 11. List of GO terms enriched in genes with TR-binding detected in TR $\alpha$  (-/-) intestine

Supplementary Data 12. List of pathways enriched in genes with TR-binding detected in TR $\alpha$  (-/-) intestine

Supplementary Data 13. List of GO terms enriched among TR-bound genes in wild-type but not TR $\alpha$  (-/-) intestine

Supplementary Data 14. List of pathways enriched among TR-bound genes in wild-type but not TR $\alpha$  (-/-) intestine

Supplementary Data 15. List of TR-bound and T3 up-regulated genes in the "cell cycle" pathway

Supplementary Data 16. Primers and probes used for TaqMan-FAM based real time PCR

Supplementary Data 17. Primers used for ChIP-PCR

Supplementary Data 18. Figure 2a\_Raw data. List of GO terms enriched in genes with TR-binding detected in wild-type intestine

Supplementary Data 19. Figure 2b\_Raw data. List of pathways enriched in genes with TR-binding detected in wild-type intestine

Supplementary Data 20. Figure 6a\_Raw data. List of pathways enriched among TR-bound genes in wild-type but not TR $\alpha$  (-/-) intestine

Supplementary Data 21. Figure 7b-c\_Raw data. Body and Intestinal length after 2 days of T3 treatment

Supplementary Data 22. Figure 7d\_Raw data. TUNEL positive area in the intestine after 2 days of T3 treatment
